# Supplementary material
Source: PubMed Central journal article supplement (PMC6109929)
Supplement: supp_RA118.003640_137685_1_supp_159537_prwrf1.pdf [file supp_RA118.003640_137685_1_supp_159537_prwrf1.pdf]

# **Biochemical characterization and chemical inhibition of PfATP4-associated Na<sup>+</sup>-ATPase activity in *Plasmodium falciparum* membranes**

James E. O. Rosling, Melanie C. Ridgway, Robert L. Summers, Kiaran Kirk, and Adele M. Lehane

*From the Research School of Biology, Australian National University, Canberra, Australian Capital Territory 2601, Australia*

## **Supporting Information**

Included material:

**Fig S1.** The effects of various compounds on *P. falciparum* membrane ATPase activity under high-[Na<sup>+</sup>] (125.5 mM) and low-[Na<sup>+</sup>] (0.5 mM) conditions.

**Fig S2.** The effect of a range of ATP and Na<sup>+</sup> concentrations on PfATP4-associated ATPase activity.

**Fig S3.** The effect of pH on the Na<sup>+</sup>-dependence of PfATP4-associated ATPase activity.

a

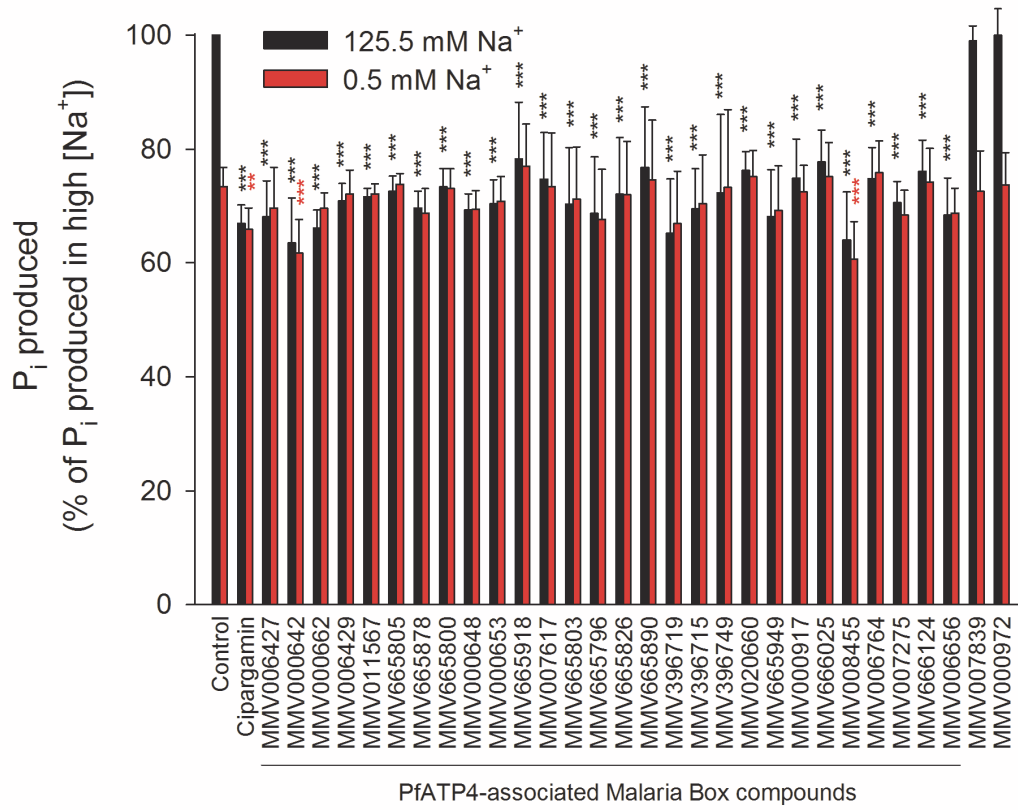

b

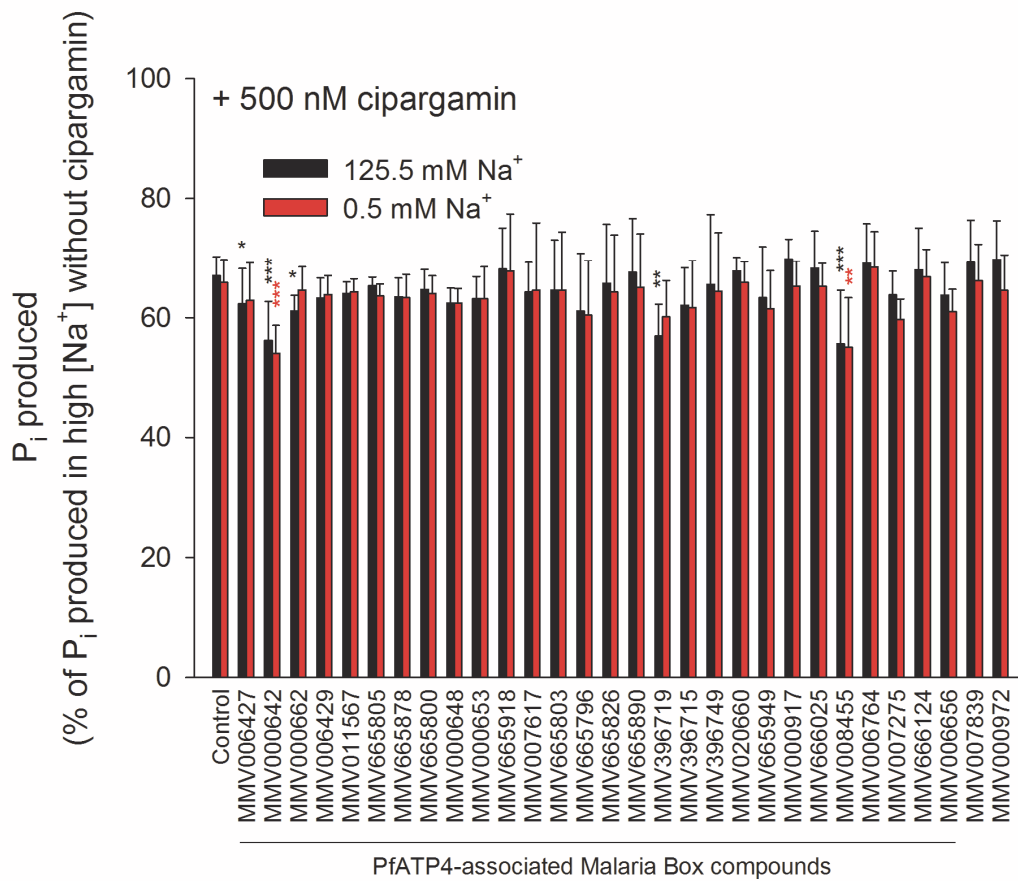

**Fig S1. The effects of various compounds on *P. falciparum* membrane ATPase activity under high-[Na<sup>+</sup>] (125.5 mM) and low-[Na<sup>+</sup>] (0.5 mM) conditions.** Cipargamin was tested at a concentration of 500 nM; the other compounds (all from the Malaria Box, with 28 of them having PfATP4-associated activity and two of them, MMV007839 and MMV000972, having activity against an unrelated transport protein) were tested at a concentration of 4 μM. The compounds were tested for their effects individually (a) and in the presence of 500 nM cipargamin (b). In all cases the ATP concentration was 0.25 mM, the pH was 7.4, and the duration of the reaction was 15 min. The data were obtained with Dd2 parasites and are shown as the mean (+ S.D.) from three to five independent experiments, each performed on different days with different membrane preparations. The protein content of the membrane preparations was not quantified in these experiments; each reaction well contained membrane from  $3 \times 10^6$  cells. For each compound, the (pre-normalised) data were tested for statistical significance compared to the Control (0.4% v/v DMSO (a) or 500 nM cipargamin only (b)) data for the same (high-[Na<sup>+</sup>] or low-[Na<sup>+</sup>]) condition using a one-way ANOVA (which yielded an F probability < 0.001 in each case) followed by a *post hoc* least significant difference test; \**p* < 0.05, \*\**p* < 0.01, \*\*\**p* < 0.001.

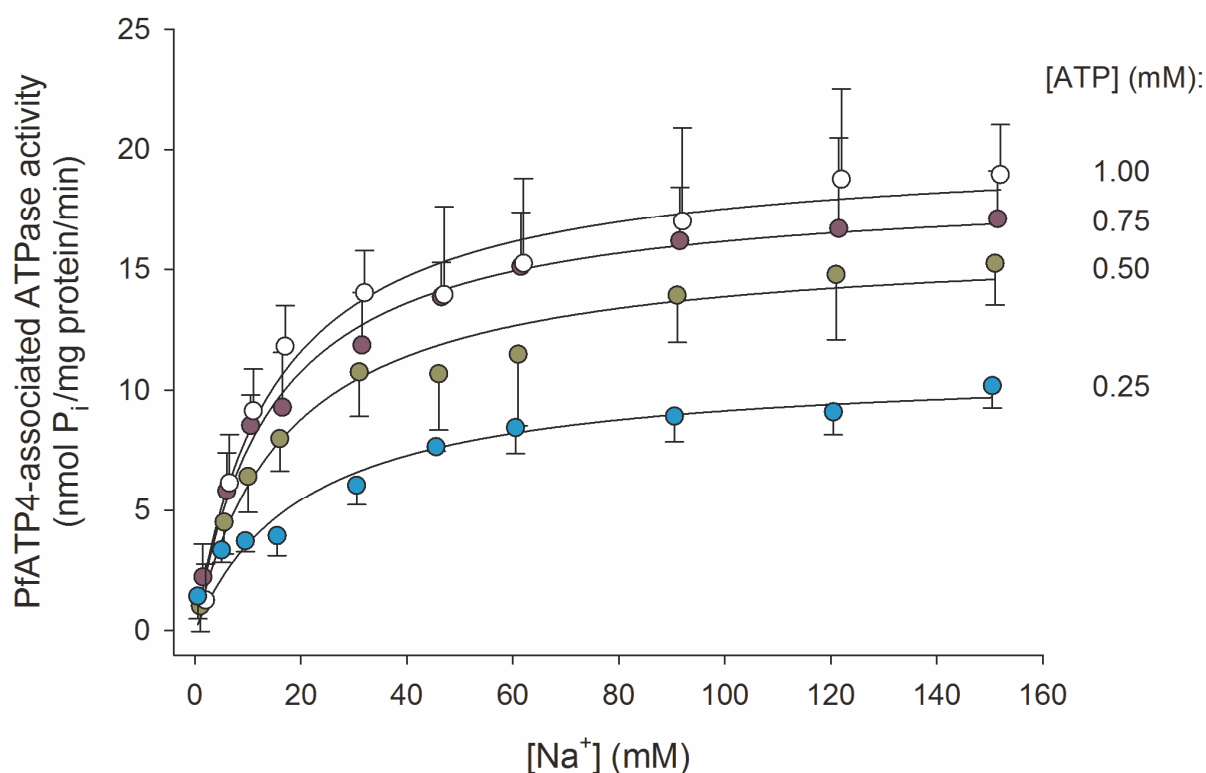

**Fig S2. The effect of a range of ATP on the Na<sup>+</sup>-dependence of PfATP4-associated ATPase activity.** The data were obtained with Dd2 parasites and are shown as the mean ( $\pm$  S.D.) from five independent experiments, each performed on different days with different membrane preparations. For clarity, only upward error bars are shown for the data obtained with 1 mM and 0.75 mM ATP and only downward error bars are shown for the data obtained with 0.5 mM and 0.25 mM ATP. The addition of ATP to the reaction mixtures was found to give rise to minor effects on pH (see Fig 3 legend). The Michaelis-Menten equation (PfATP4-associated ATPase activity =  $V_{\max} \times [\text{Na}^+] / ([\text{Na}^+] + K_m(\text{Na}^+))$ ) was fitted to the data obtained at each of the four ATP concentrations. The  $K_m(\text{Na}^+)$  values (in mM; mean  $\pm$  S.D.) estimated in this series of experiments at each of the different ATP concentrations were:  $15.0 \pm 4.0$  with 1 mM ATP,  $15.0 \pm 5.7$  with 0.75 mM ATP,  $17.6 \pm 3.6$  with 0.5 mM ATP, and  $20.6 \pm 3.6$  with 0.25 mM ATP. The  $K_m(\text{Na}^+)$  obtained in the presence of 0.25 mM ATP differed significantly from that obtained in the presence of 1 mM ATP ( $p = 0.03$ , paired t-tests). All other comparisons did not yield statistically significant differences (i.e.  $p > 0.05$ ). The  $V_{\max}$  values (in nmol P<sub>i</sub> per mg (total) protein per min; mean  $\pm$  S.D.) were:  $20.2 \pm 3.5$  with 1 mM ATP,  $18.6 \pm 2.9$  with 0.75 mM ATP,  $16.3 \pm 2.3$  with 0.5 mM ATP, and  $11.0 \pm 1.2$  with 0.25 mM ATP. These values are all significantly different from one another ( $p < 0.04$ , paired t-tests).

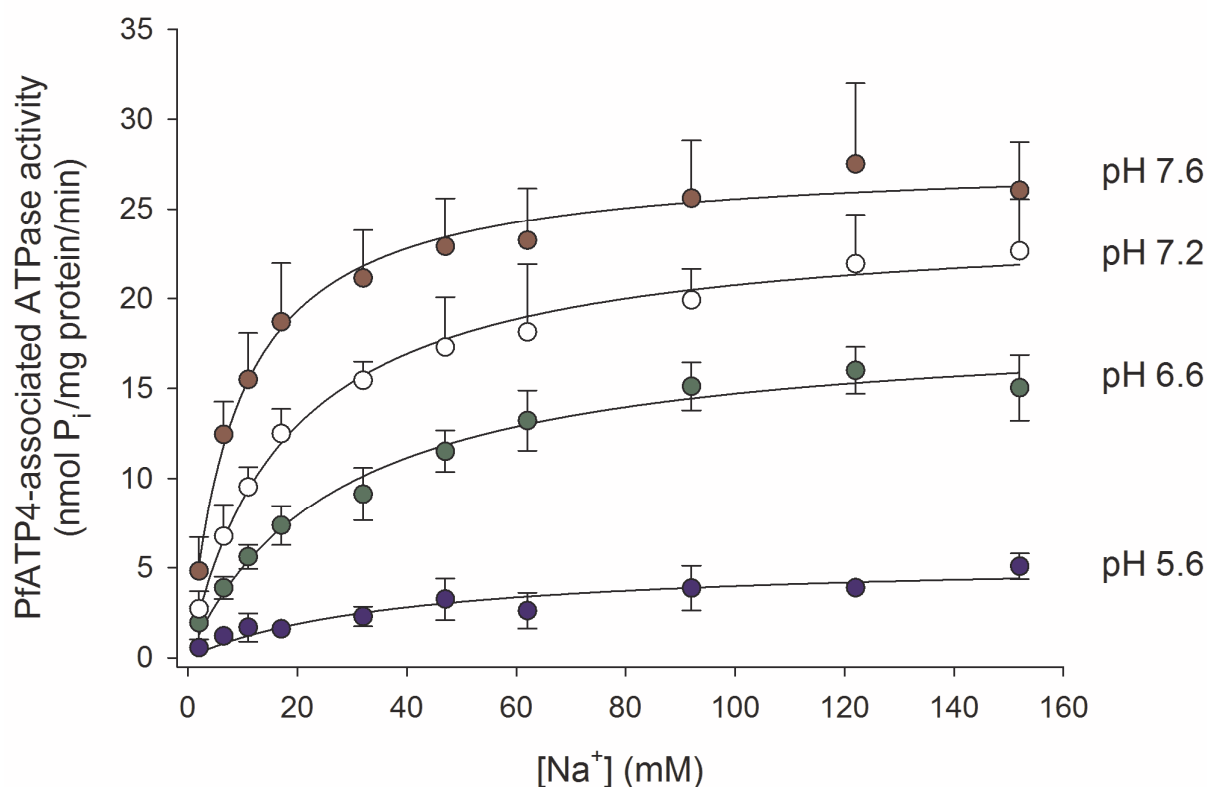

**Fig S3. The effect of pH on the Na<sup>+</sup>-dependence of PfATP4-associated ATPase activity.** The data were obtained with Dd2 parasites and are shown as the mean ( $\pm$  S.D.) from three independent experiments, each performed on different days with different membrane preparations. Where not shown the error bars fall within the symbols. For clarity, only upward error bars are shown for the data obtained at pH 7.6 and 7.2. The Michaelis-Menten equation (PfATP4-associated ATPase activity =  $V_{\max} \times [\text{Na}^+] / ([\text{Na}^+] + K_m(\text{Na}^+))$ ) was fitted to the data obtained at each of the four different pH values tested. The  $K_m(\text{Na}^+)$  values (in mM; mean  $\pm$  S.D.) estimated in this series of experiments at each of the different pH values were:  $45 \pm 19$  at pH 5.6,  $27.4 \pm 4.5$  at pH 6.6,  $17.9 \pm 3.3$  at pH 7.2, and  $8.9 \pm 2.2$  at pH 7.6. The difference in the estimated  $K_m(\text{Na}^+)$  values attained statistical significance ( $p = 0.007$ , paired t-test) for the pH 7.6 versus pH 6.6 comparison. All other comparisons did not yield statistically significant differences (i.e.  $p > 0.05$ ). The  $V_{\max}$  values (in nmol P<sub>i</sub> per mg (total) protein per min; mean  $\pm$  S.D.) were:  $5.7 \pm 0.3$  at pH 5.6,  $18.7 \pm 2.0$  at pH 6.6,  $24.5 \pm 3.2$  at pH 7.2, and  $27.8 \pm 3.4$  at pH 7.6. These values are all significantly different from one another ( $p < 0.05$ , paired t-tests).
